# Supplementary material for: SHP2 negatively regulates HLA-ABC and PD-L1 expression via STAT1 phosphorylation in prostate cancer cells
Source: PubMed Central journal article supplement (PMC5581127; doi:10.18632/oncotarget.18591), 2017-06-21
Supplement: oncotarget-08-53518-s001.pdf [file oncotarget-08-53518-s001.pdf]

# SHP2 negatively regulates HLA-ABC and PD-L1 expression via STAT1 phosphorylation in prostate cancer cells

## SUPPLEMENTARY MATERIALS

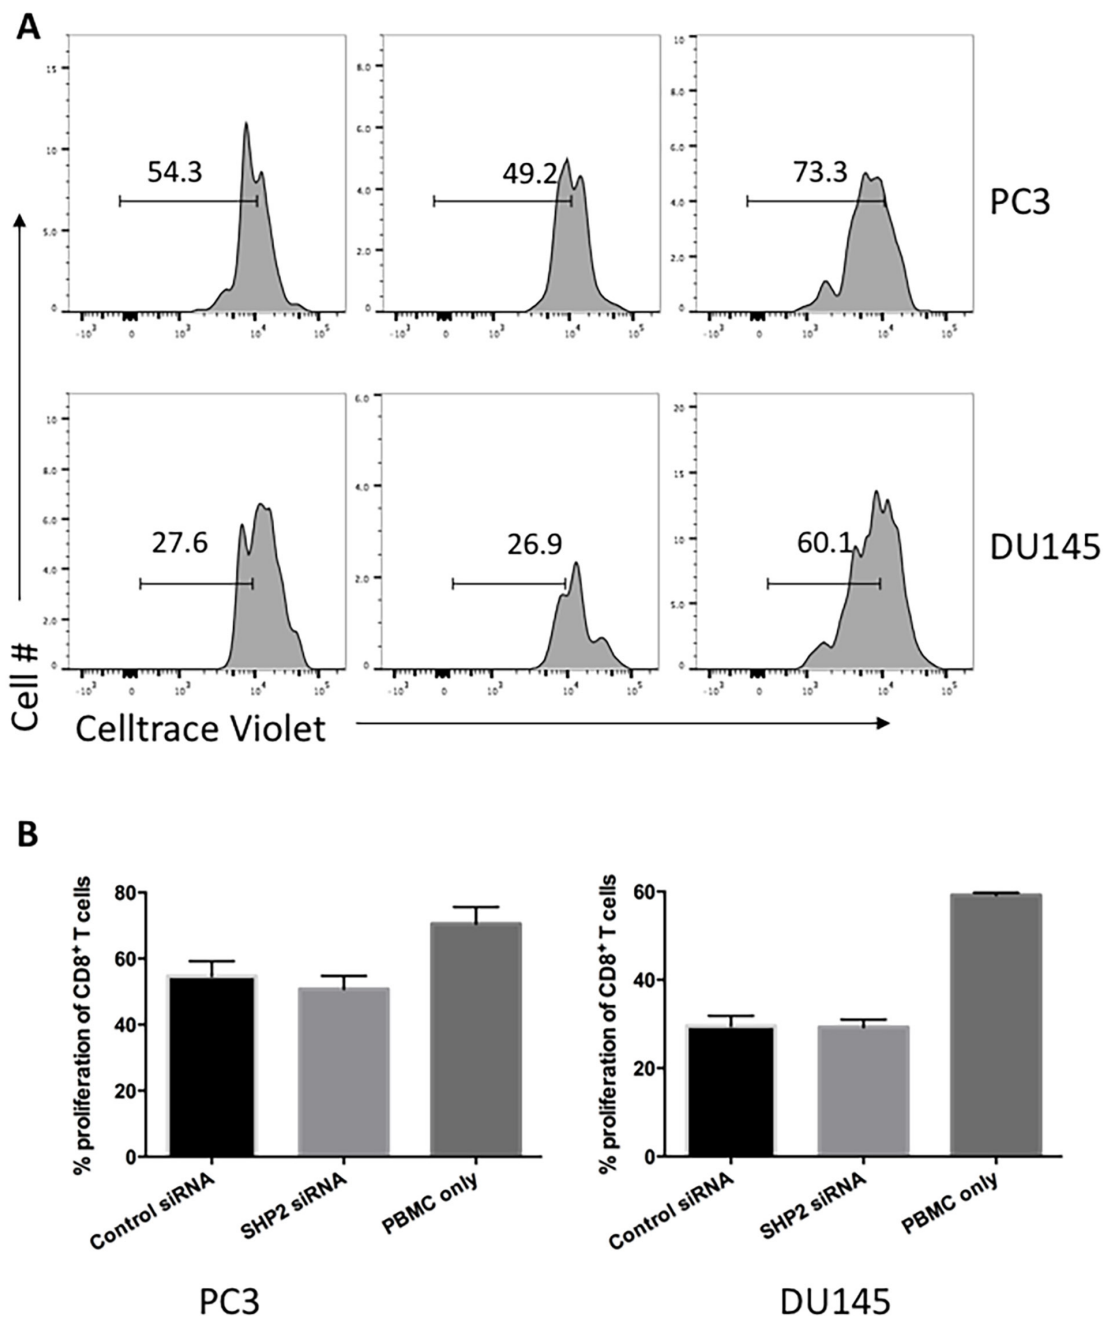

**Supplementary Figure 1: SHP2 depletion of PCa cells did not affect CD8 T cell proliferation.** (A) Representative flow histograms of CD8 T cells proliferation are shown. (B) Bar graphs represent mean  $\pm$ SD from duplicate samples in three independent experiments.
